# Supplementary material for: Influence of carbonization temperature and press processing on the electrochemical characteristics of self-standing iron oxide/carbon composite electrospun nanofibers
Source: Royal Society of Chemistry journal article supplement (doi:10.1039/c7ra05301k), 2017-01-01
Supplement: c7ra05301k1.pdf [file c7ra05301k1.pdf]

Supporting Information

**Influence of carbonization temperature and press processing on the electrochemical characteristics of the self-standing iron oxide/carbon composite electrospun nanofibers**

Jyunichiro Abe, Koki Kawase, Naoki Tachikawa, Yasushi Katayama and Seimei Shiratori

**Affiliation:** Graduate School of Science and Technology, Keio University

**Author Address:** Graduate School of Science and Technology, Keio University, Hiyoshi 3-14-1, Kohoku-ku, Yokohama city, Japan

Tel: +81-045-566-1602

E-mail: shiratori@appi.keio.ac.jp

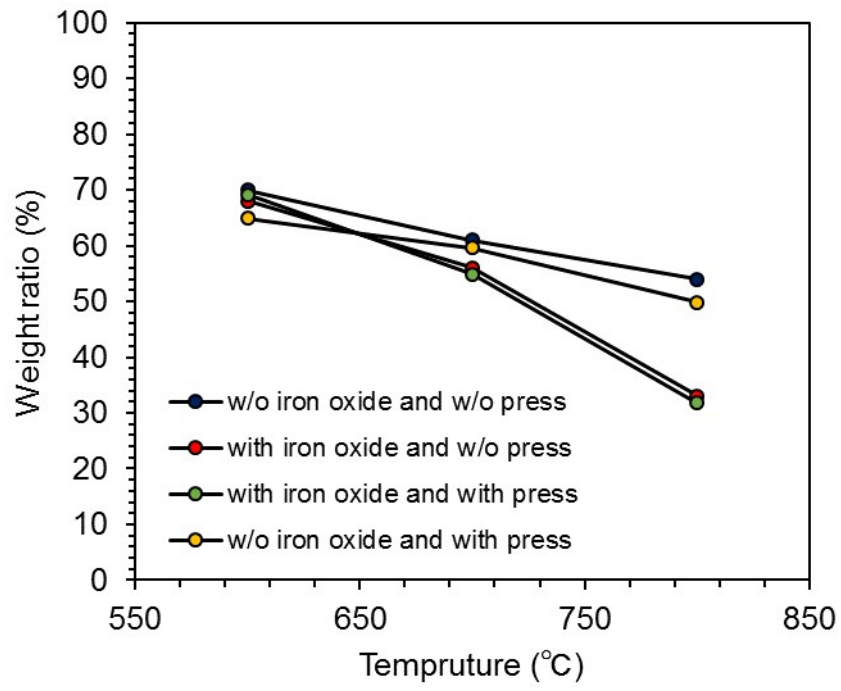

**Fig. S1** Weight retention of the self-standing carbon nanofibers and the iron oxide/carbon composite nanofibers with and without press processing for various carbonization temperature.

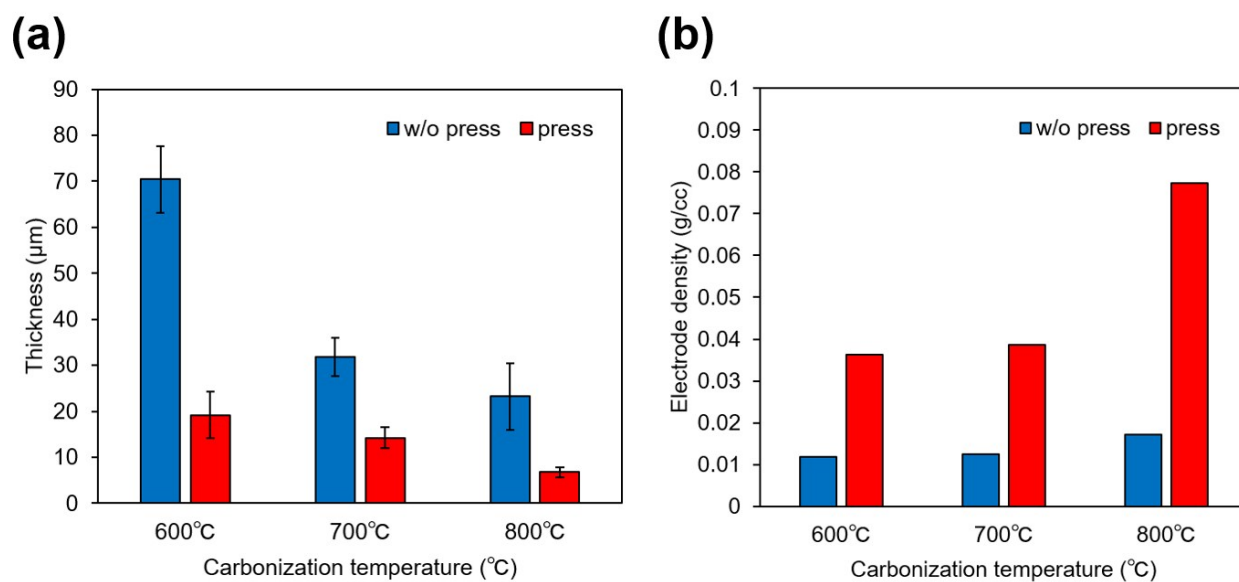

**Fig. S2** (a) Thickness and (b) Electrode density of the self-standing iron oxide/carbon composite nanofibers without and with press processing for various carbonization temperature.

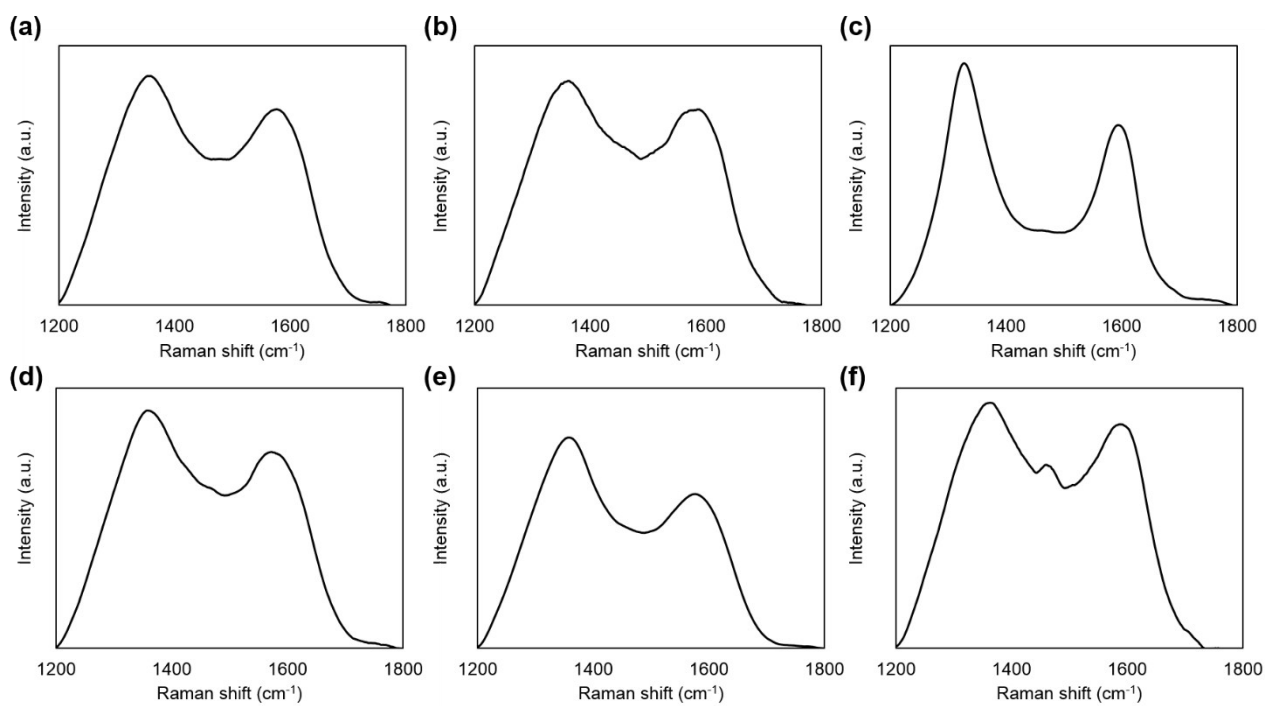

**Fig. S3** Raman spectra of the self-standing iron oxide/carbon composite electrospun nanofibers; (a) Calcination temperature: 600 °C, without press treatment (b) Calcination temperature: 700 °C, without press treatment (c) Calcination temperature: 800 °C, without press treatment (d) Calcination temperature: 600 °C, with press treatment (e) Calcination temperature: 700 °C, with press treatment (f) Calcination temperature: 800 °C, with press treatment.

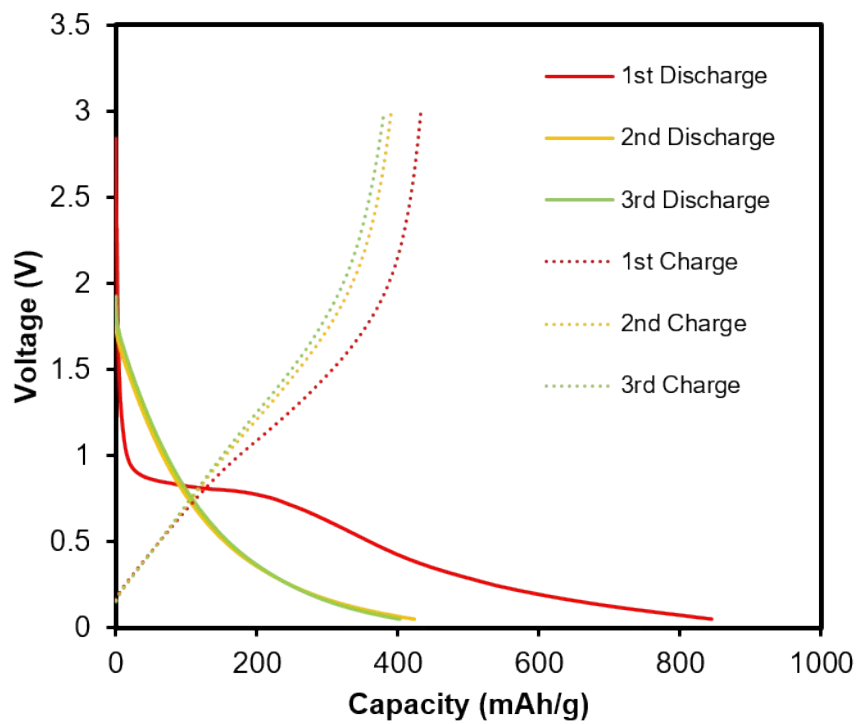

**Fig. S4** 1<sup>st</sup> – 3<sup>rd</sup> charge–discharge curves of the self-standing electrospun carbon nanofiber carbonized at 800 °C, without press

treatment.

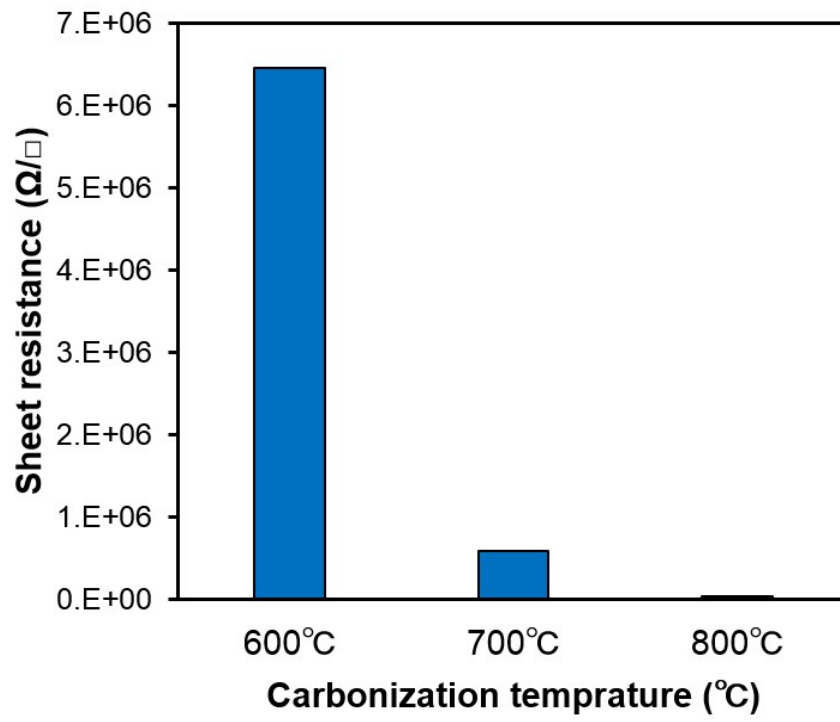

**Fig. S5** Sheet resistance of the self-standing iron oxide/carbon composite electrospun nanofibers carbonized at various temperature with press processing.

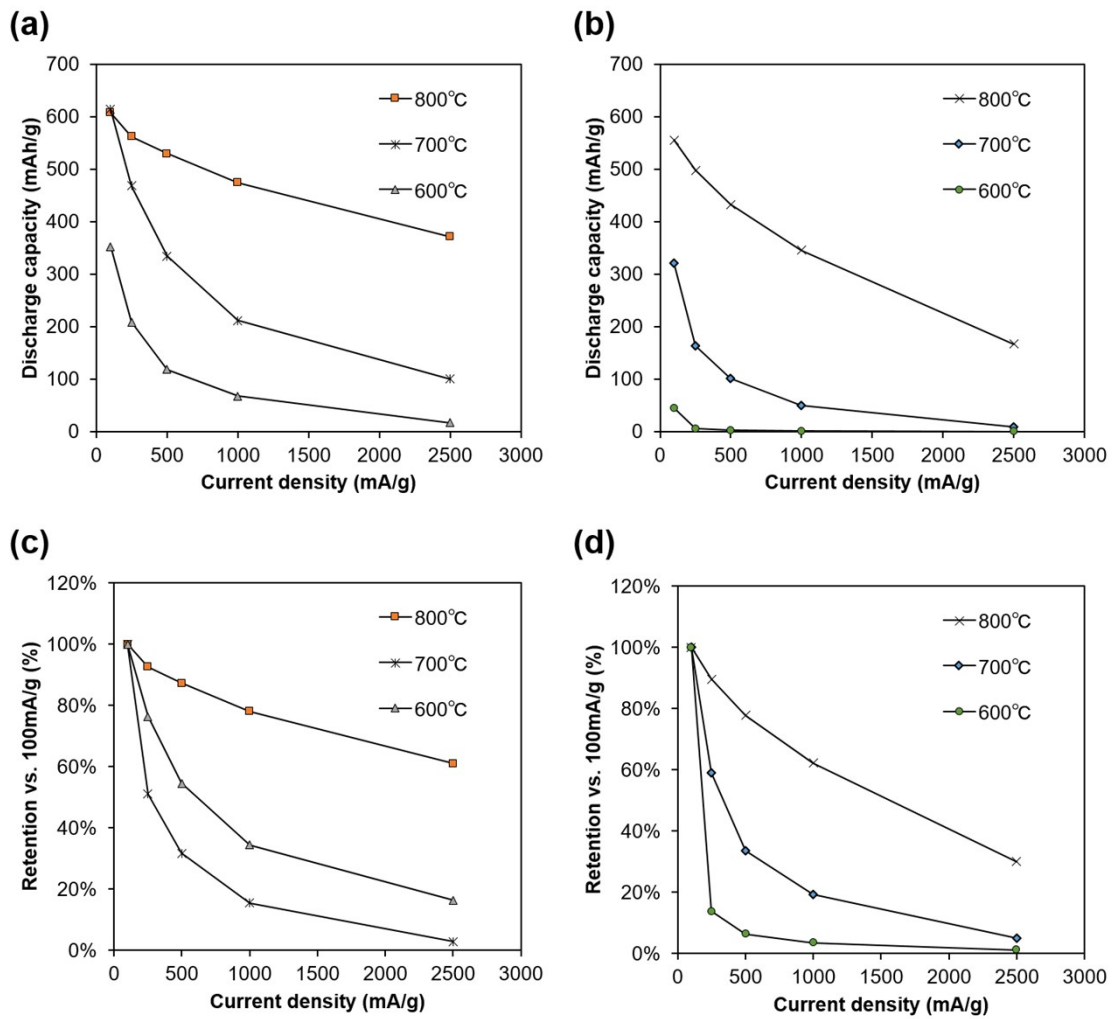

**Fig. S6** Discharge capacity of the self-standing iron oxide/carbon composite nanofibers (a) without and (b) with press processing,

Capacity retention of the self-standing iron oxide/carbon composite nanofibers (a) without and (b) with press processing for various current density.

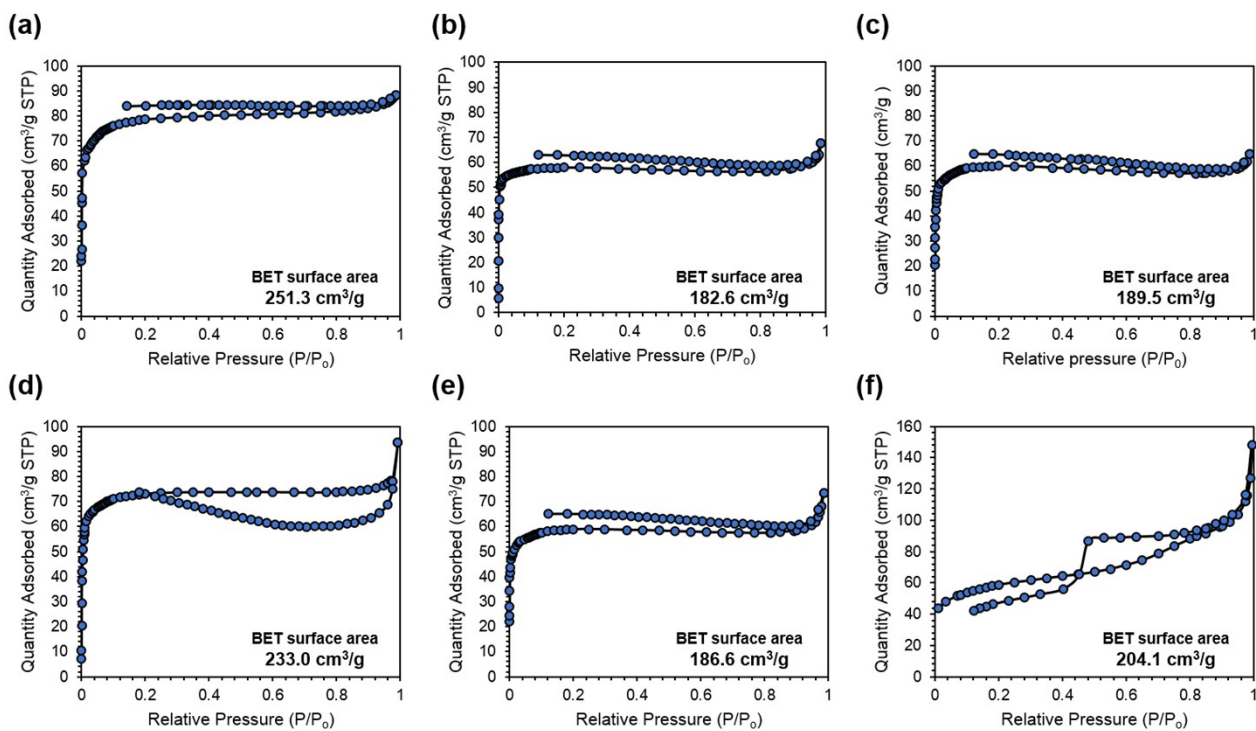

**Fig. S7** Gas adsorption-desorption isotherms of self-standing iron oxide/carbon composite nanofibers: (a) carbonization at 600 °C, without press treatment; (b) carbonization at 700 °C, without press treatment; (c) carbonization at 800 °C, without press treatment; (d) carbonization at 600 °C, with press treatment; (e) carbonization at 700 °C, with press treatment; (f) carbonization at 800 °C, with press treatment.
